# Supplementary material for: Deregulated expression of NKL homeobox genes in T-cell lymphomas
Source: PubMed Central journal article supplement (PMC6524933; doi:10.18632/oncotarget.26929), 2019-05-14
Supplement: oncotarget-10-3227-s001.pdf [file oncotarget-10-3227-s001.pdf]

# Deregulated expression of NKL homeobox genes in T-cell lymphomas

## SUPPLEMENTARY MATERIALS

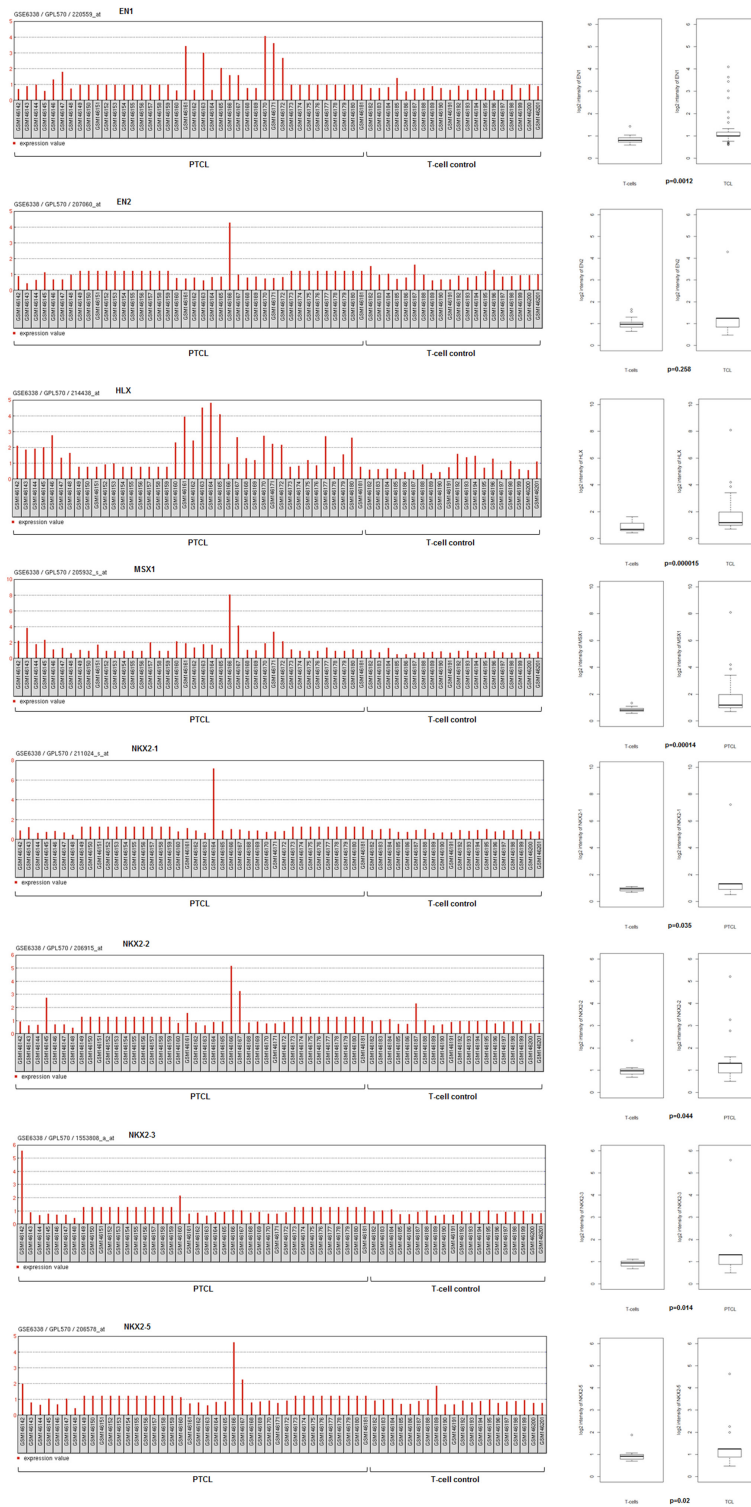

**Supplementary Figure 1: Screening of PTCL patients in comparison to T-cell controls using dataset GSE6338.** Boxplots and calculated *p*-values indicate samples showing particular NKL homeobox gene overexpression.

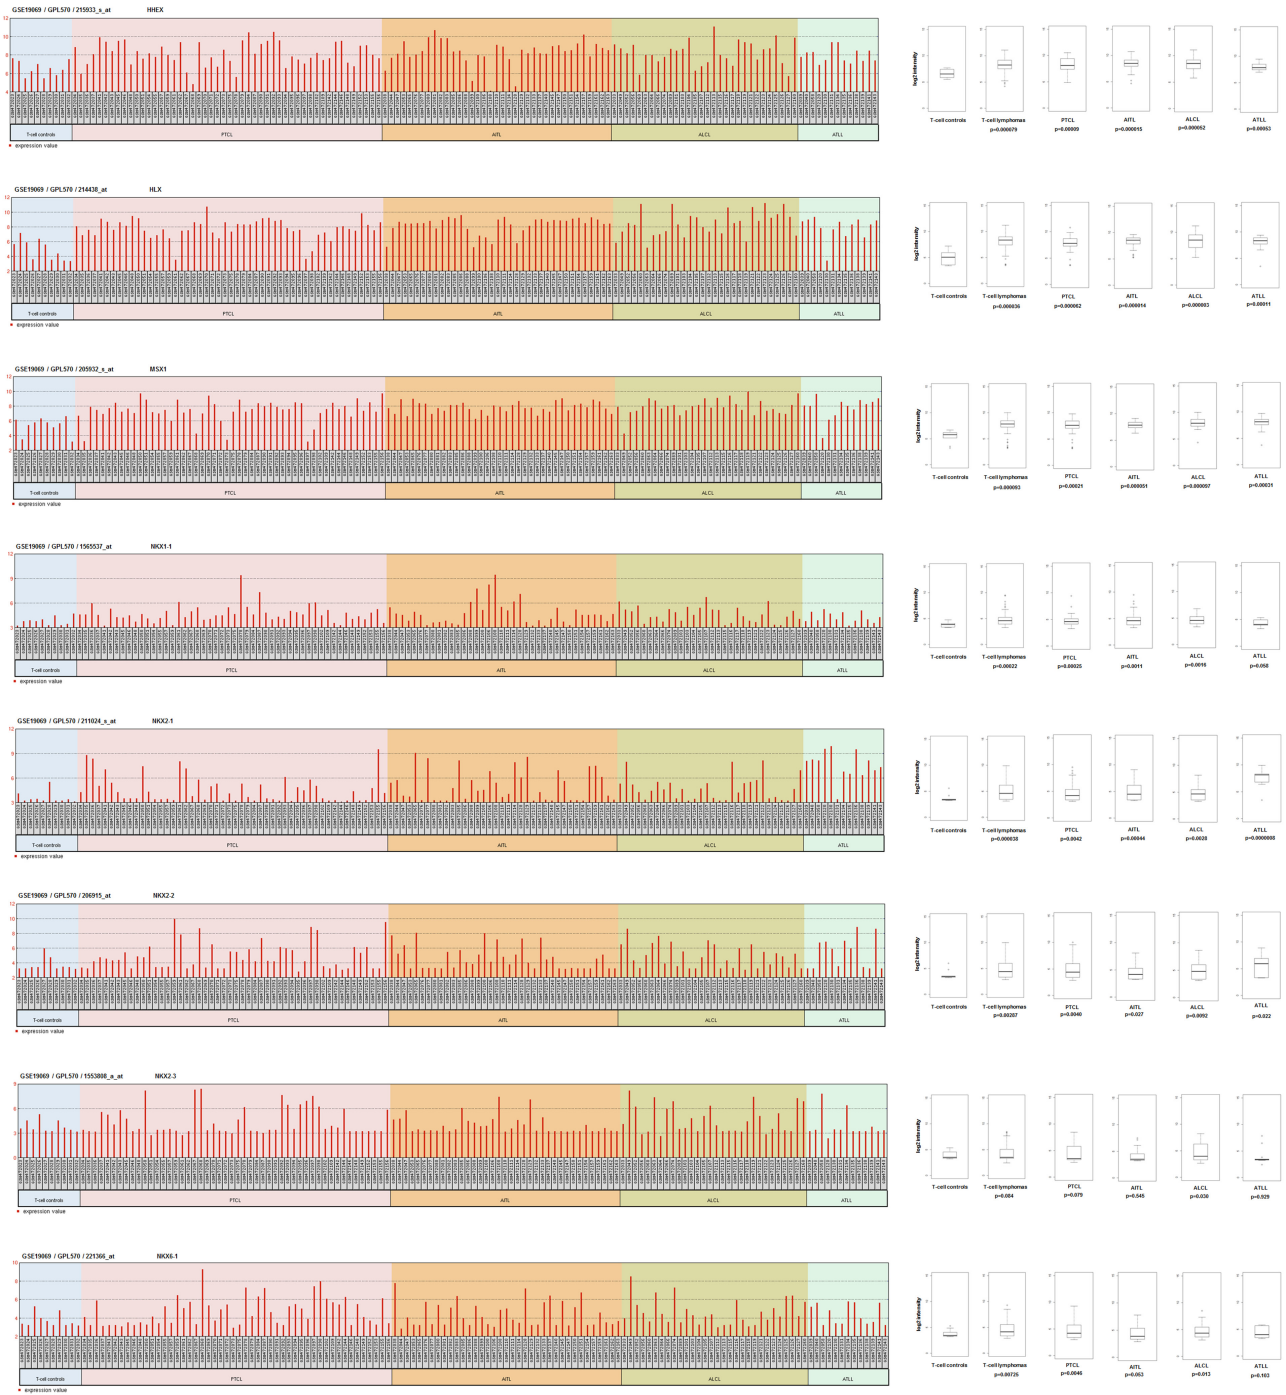

**Supplementary Figure 2: Screening of PTCL, AITL, ALCL, and ATLL patients in comparison to T-cell controls using dataset GSE19069. Boxplots and calculated *p*-values indicate samples showing particular NK homeobox gene overexpression.**

### HHEX

GSE57944 / GPL570 / 215933\_s\_at

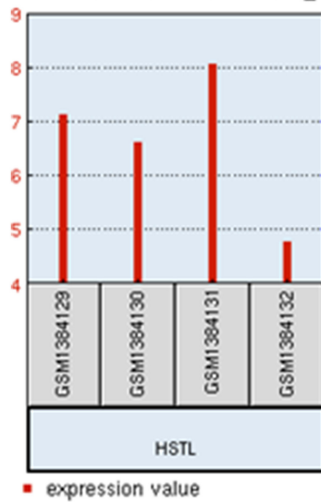

### HLX

GSE57944 / GPL570 / 214438\_at

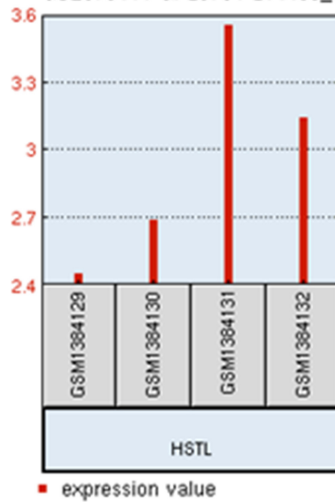

### MSX1

GSE57944 / GPL570 / 205932\_s\_at

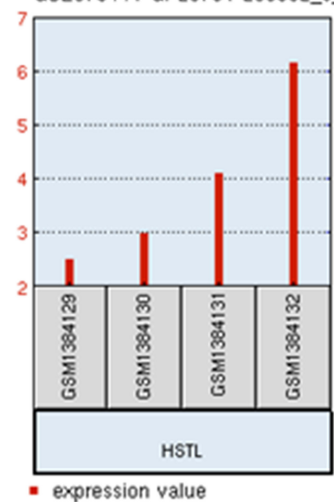

### NKX2-3

GSE57944 / GPL570 / 1553808\_a\_at

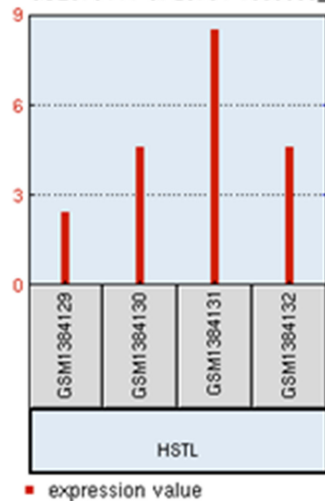

### NKX2-5

GSE57944 / GPL570 / 206578\_at

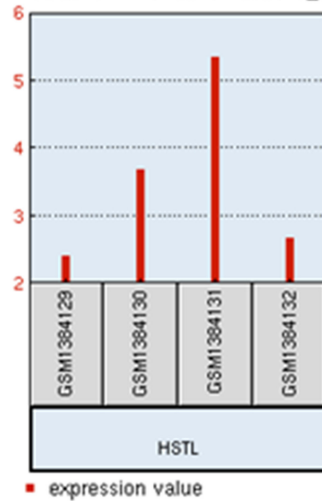

### TLX1

GSE57944 / GPL570 / 207179\_at

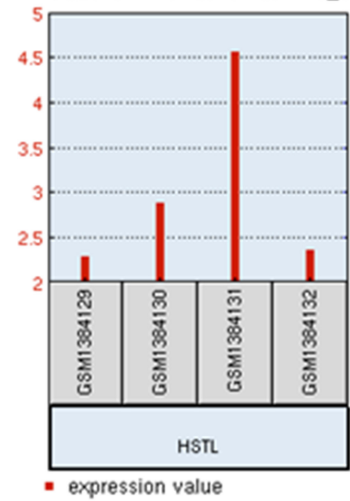

**Supplementary Figure 3: Screening of HSTL patients using dataset GSE57944.** We have set a cut-off at 3.0 to identify overexpressed NKL homeobox genes.

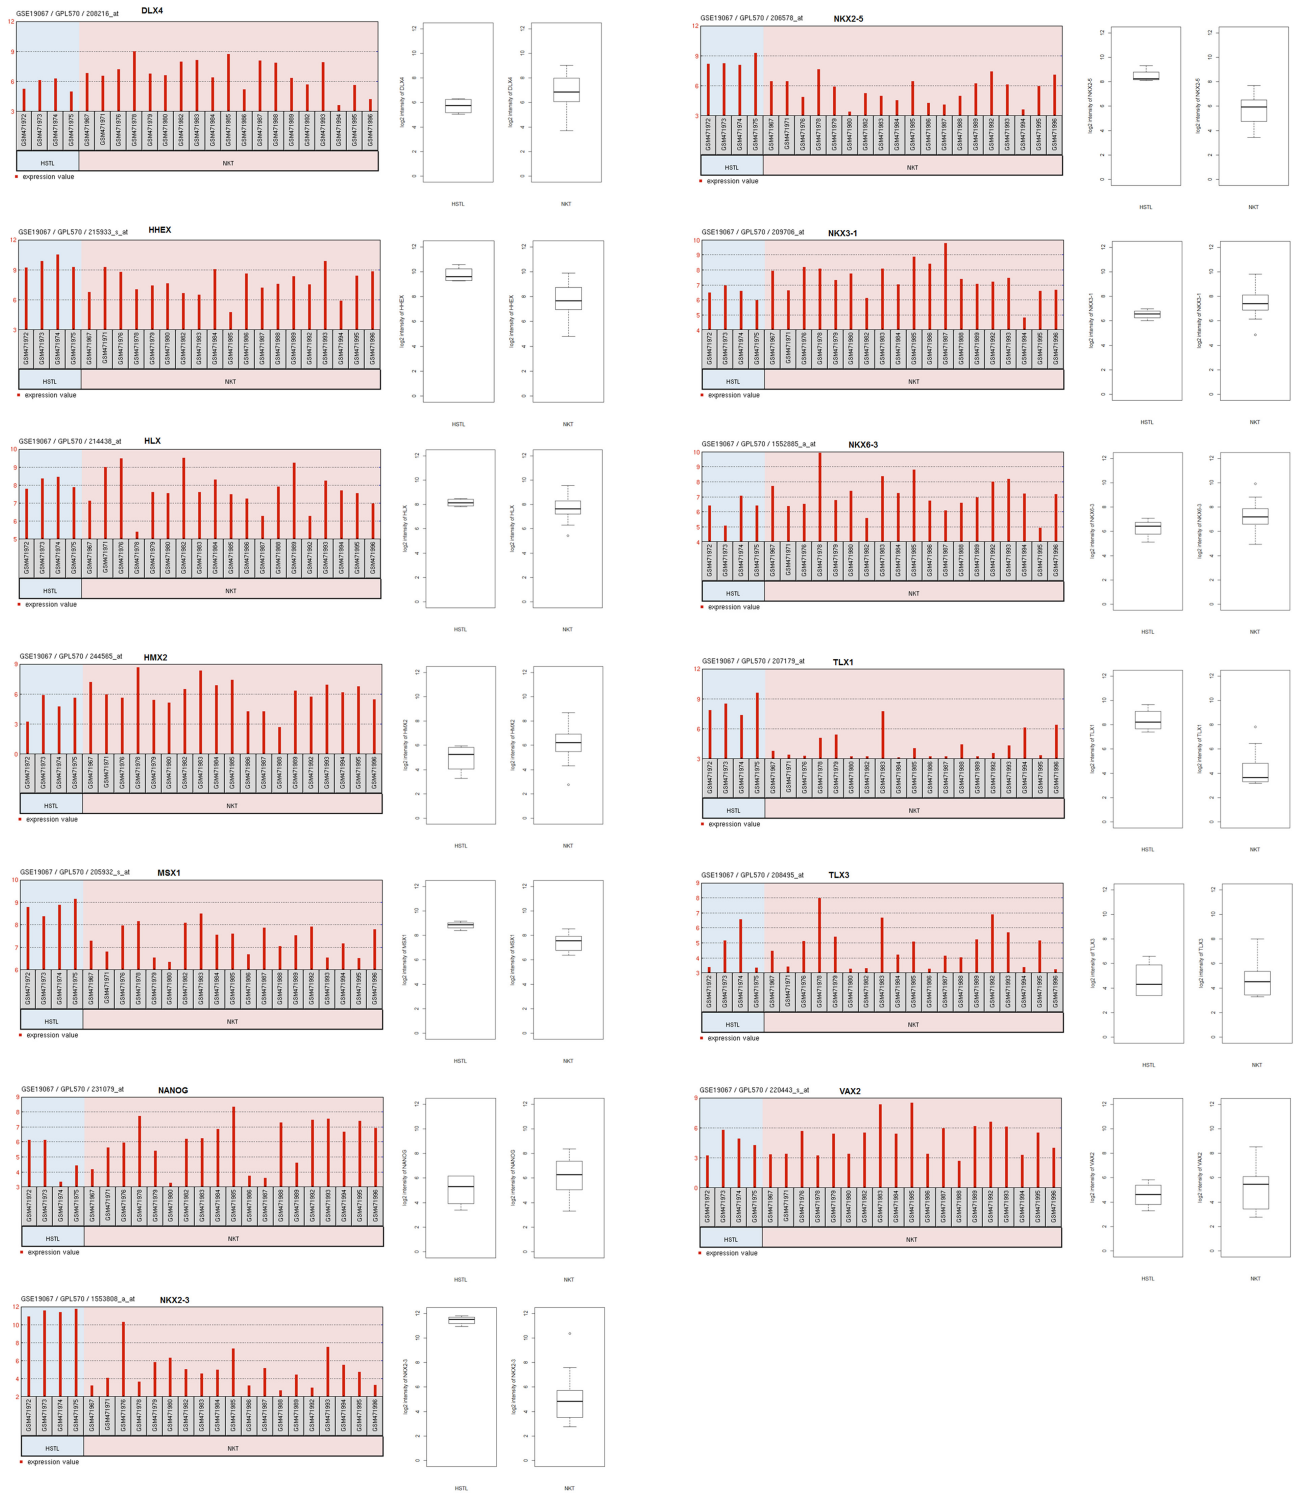

**Supplementary Figure 4: Screening of HSTL and NKTL patients using dataset GSE19067. We have set a cut-off at 8.0 to identify overexpressed NKL homeobox genes.**



Hematopoietic cell lines (GSE57083)

GSE57083 / GPL570 / 205932\_s\_at

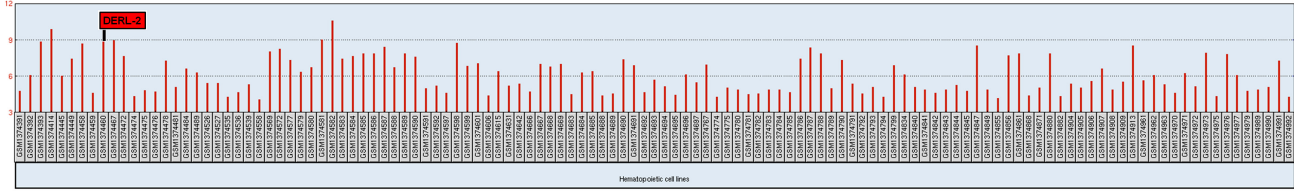

■ expression value

|            |              |         |
|------------|--------------|---------|
| GSM1374391 | AML143D10    | 4.81264 |
| GSM1374392 | AMO-1        | 6.11963 |
| GSM1374393 | ARH-77       | 8.87046 |
| GSM1374414 | BY-173       | 9.92991 |
| GSM1374445 | CCRFCM       | 6.04892 |
| GSM1374449 | CMK          | 7.45867 |
| GSM1374458 | CTV-1        | 8.72803 |
| GSM1374459 | DAUDI        | 4.67645 |
| GSM1374460 | DERL-2       | 8.8694  |
| GSM1374467 | DOHH-2       | 8.99924 |
| GSM1374472 | EHEB         | 7.70832 |
| GSM1374474 | EM-2         | 4.49702 |
| GSM1374475 | EOL-1        | 4.84993 |
| GSM1374476 | ESKOL        | 4.77991 |
| GSM1374478 | F367         | 7.33344 |
| GSM1374481 | FARAGE       | 5.13075 |
| GSM1374484 | GRAN1A-519   | 6.66211 |
| GSM1374489 | HBL-1        | 6.33476 |
| GSM1374526 | HEL          | 5.9229  |
| GSM1374527 | HEL          | 5.4774  |
| GSM1374535 | HL-60        | 4.33215 |
| GSM1374536 | HL-60        | 4.69974 |
| GSM1374539 | HLY-1        | 5.36601 |
| GSM1374558 | HT           | 4.13094 |
| GSM1374569 | HUT-78       | 8.08409 |
| GSM1374572 | IM9          | 8.29258 |
| GSM1374577 | Jeko         | 7.35558 |
| GSM1374579 | JNJ3         | 6.40014 |
| GSM1374580 | JURKAT       | 6.77721 |
| GSM1374581 | JVM-2        | 9.01873 |
| GSM1374582 | JVM-3        | 10.4347 |
| GSM1374583 | K-562        | 7.45821 |
| GSM1374584 | KARPAS-1106p | 7.69513 |
| GSM1374585 | KARPAS-1106p | 7.88509 |
| GSM1374586 | KARPAS-231   | 7.89319 |
| GSM1374587 | KARPAS-231   | 8.43804 |
| GSM1374588 | KARPAS-422   | 6.77494 |
| GSM1374589 | KARPAS-620   | 7.92691 |
| GSM1374590 | KASUMI-1     | 7.61184 |
| GSM1374591 | KASUMI-3     | 5.00796 |
| GSM1374592 | KASUMI-6     | 5.23447 |
| GSM1374597 | KG-1         | 4.62743 |
| GSM1374598 | KG-1a        | 8.77724 |
| GSM1374599 | KIT-225      | 6.89455 |
| GSM1374601 | KMS12BM      | 7.10693 |
| GSM1374606 | KO-12        | 4.4223  |
| GSM1374615 | L-363        | 6.42297 |
| GSM1374631 | LP1          | 5.22318 |
| GSM1374642 | MC116        | 5.40607 |
| GSM1374646 | ME-1         | 4.5839  |
| GSM1374667 | MEC1         | 7.04611 |
| GSM1374668 | MEC2         | 6.83731 |
| GSM1374669 | MEOG1        | 7.01275 |
| GSM1374683 | MM-2         | 4.57413 |
| GSM1374684 | MM1R         | 6.35095 |
| GSM1374685 | MM18         | 6.44897 |
| GSM1374688 | MOLM-13      | 4.41052 |
| GSM1374689 | MOLM-13      | 4.58289 |
| GSM1374690 | MOLM-16      | 7.39349 |
| GSM1374691 | MOLP-8       | 6.91705 |
| GSM1374692 | MOMO-MAC-6   | 4.70305 |
| GSM1374693 | MUT2-3       | 5.73012 |
| GSM1374694 | MV4-11       | 5.18767 |
| GSM1374695 | NAMALWA      | 4.44645 |
| GSM1374696 | NB-4         | 6.17113 |
| GSM1374697 | NB-4         | 5.53249 |
| GSM1374767 | NCLH929      | 7.00718 |
| GSM1374774 | NOHO-1       | 4.30754 |
| GSM1374775 | NOHO-1       | 5.08407 |
| GSM1374780 | OCI-AML2     | 4.90301 |
| GSM1374781 | OCI-AML5     | 4.56474 |
| GSM1374782 | OCI-AML5     | 4.57837 |
| GSM1374783 | OCI-LY1      | 4.9491  |
| GSM1374784 | OCI-LY10     | 4.9149  |
| GSM1374785 | OCI-LY18     | 4.68498 |
| GSM1374786 | OCI-LY19     | 7.47108 |
| GSM1374787 | OCI-LY3      | 8.40235 |
| GSM1374788 | OCI-LY4      | 7.88233 |
| GSM1374789 | OCI-LY7      | 5.02041 |
| GSM1374790 | OCI-LY9      | 7.35858 |
| GSM1374791 | OCI-M1       | 5.41302 |
| GSM1374792 | OCI-M2       | 4.59335 |
| GSM1374793 | OCI-MY1      | 5.16752 |
| GSM1374794 | OCI-MY5      | 4.33919 |
| GSM1374799 | OPM-2        | 6.91938 |
| GSM1374834 | FL-21        | 6.1686  |
| GSM1374840 | RAJ1         | 5.14113 |
| GSM1374841 | RAJ1         | 4.80715 |
| GSM1374842 | RAJ1         | 4.66174 |
| GSM1374843 | RAMOS        | 4.90284 |
| GSM1374844 | RAMOS        | 5.30295 |
| GSM1374845 | RC-R8        | 4.80161 |
| GSM1374847 | REH          | 8.55285 |
| GSM1374849 | RI-1         | 4.949   |
| GSM1374855 | RHM1-8226    | 4.22876 |
| GSM1374856 | R84-11       | 7.76538 |
| GSM1374861 | SC-1         | 7.88348 |
| GSM1374868 | SET-2        | 4.43701 |
| GSM1374871 | SIGN-5       | 5.07958 |
| GSM1374880 | SEM-1        | 7.88591 |
| GSM1374882 | SEPM-2       | 4.40644 |
| GSM1374904 | SU-DHL-10    | 5.38712 |
| GSM1374905 | SU-DHL-2     | 5.08021 |
| GSM1374906 | SU-DHL-4     | 5.64823 |
| GSM1374907 | SU-DHL-5     | 6.68343 |
| GSM1374908 | SU-DHL-6     | 4.90413 |
| GSM1374909 | SU-DHL-8     | 5.56335 |
| GSM1374913 | SUP-B15      | 8.5666  |
| GSM1374961 | TF-1         | 5.69625 |
| GSM1374962 | THP-1        | 6.13944 |
| GSM1374963 | TMD-8        | 5.36639 |
| GSM1374970 | U-266        | 4.6452  |
| GSM1374971 | U-2932       | 6.26267 |
| GSM1374972 | U-2940       | 5.21515 |
| GSM1374973 | U-698-X      | 7.96703 |
| GSM1374975 | U-937        | 4.35866 |
| GSM1374976 | URE-1        | 7.87377 |
| GSM1374977 | ULA          | 6.13273 |
| GSM1374979 | UT-7         | 4.82523 |
| GSM1374989 | WILL-1       | 4.92335 |
| GSM1374990 | WILL-2       | 5.11594 |
| GSM1374991 | WBU-DCL2     | 7.3259  |
| GSM1374992 | WBU-NHL      | 4.32096 |

Supplementary Figure 5: Screening of 123 hematopoietic cell lines for MSX1 overexpression using dataset GSE57083. Indicated is HSTL-derived cell line DERL-2 in the bar-plot diagram (above) and in the table listing the expression values (below).

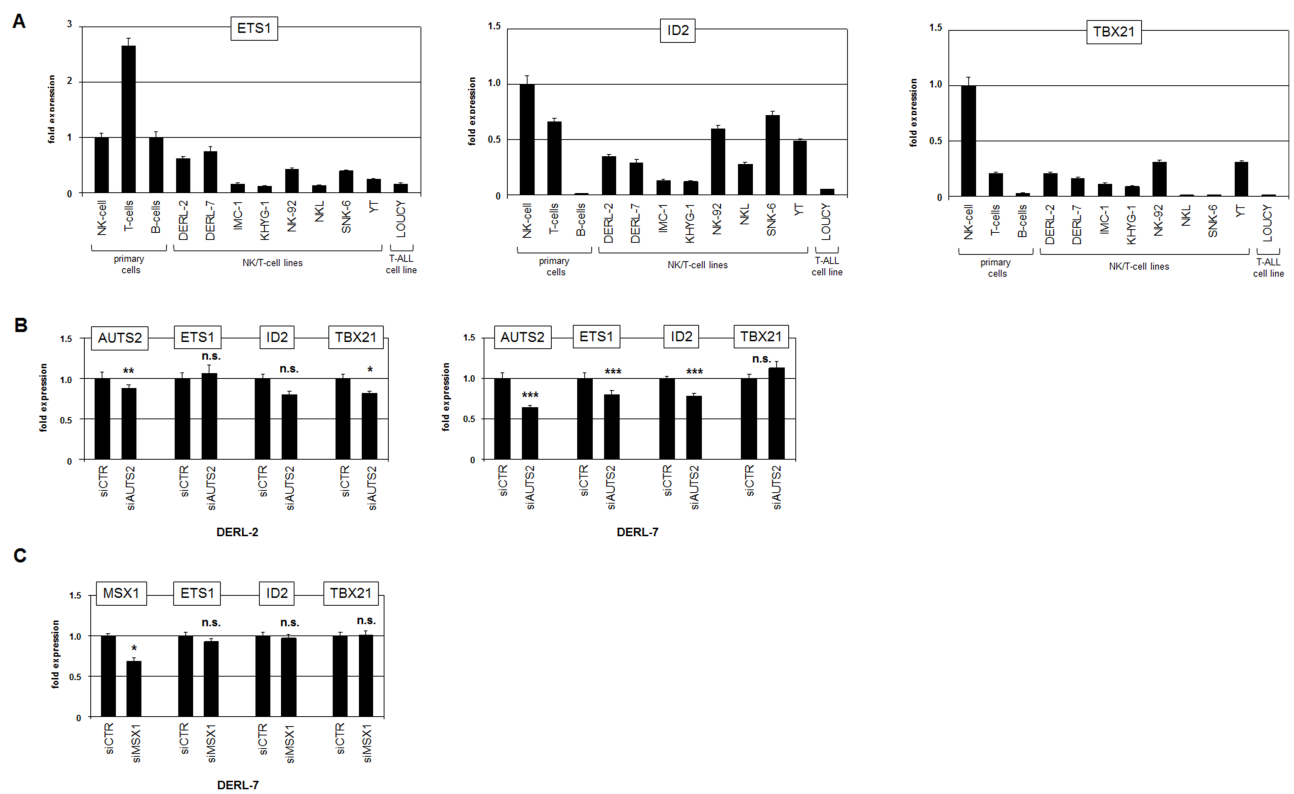

**Supplementary Figure 6:** (A) RQ-PCR analysis of ETS1, ID2, and TBX21 in primary cells and selected cell lines. RQ-PCR analysis of ETS1, ID2, and TBX21 in DERL-2/7 cells after treatment for siRNA-mediated knockdown of Auts2 (B) and Msx1 (C).

DERL-2 (H3B): T>A

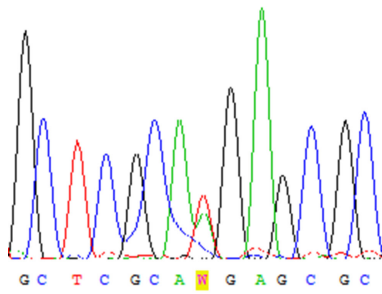

DERL-7 (H3B): T>A

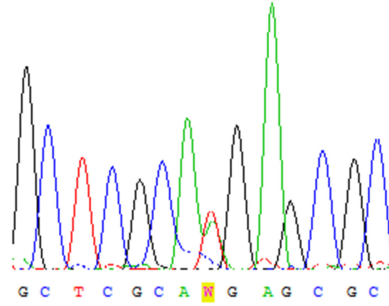

DERL-2 (KDM7A): C>T

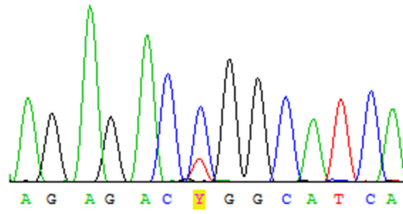

DERL-7 (KDM7A): C>T

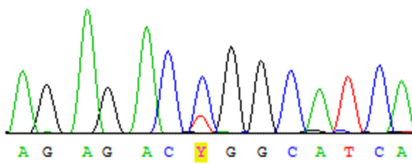

DERL-2 (SETD2): G>A(rev)

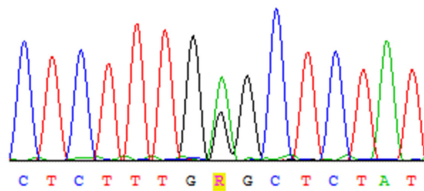

DERL-7 (SETD2): C>T

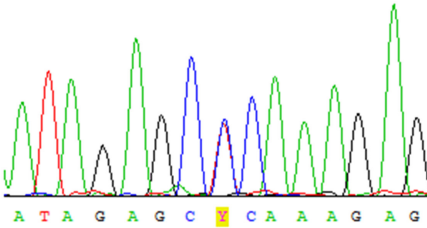

DERL-2 (STAT5B): A>C

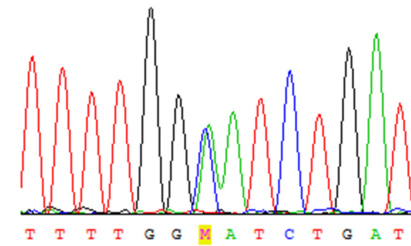

DERL-7 (STAT5B): A>C

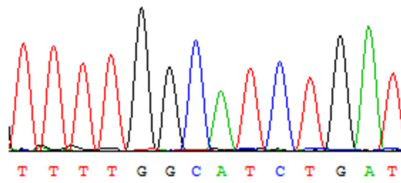

DERL-2 (TLE1): G>C

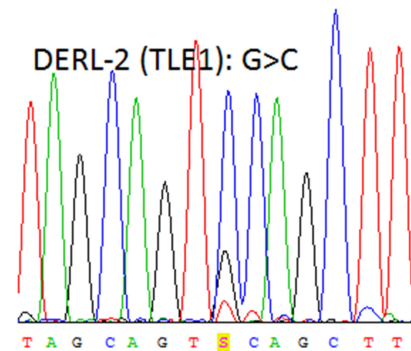

DERL-7 (TLE1): G>C

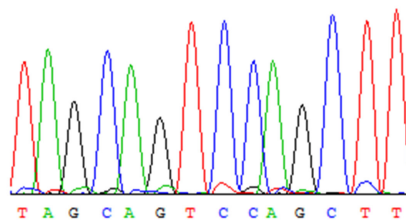

Supplementary Figure 7: Sanger sequencing data for HIST1H3B, KDM7A, SETD2, STAT5B, and TLE1 in DERL-2 and DERL-7.



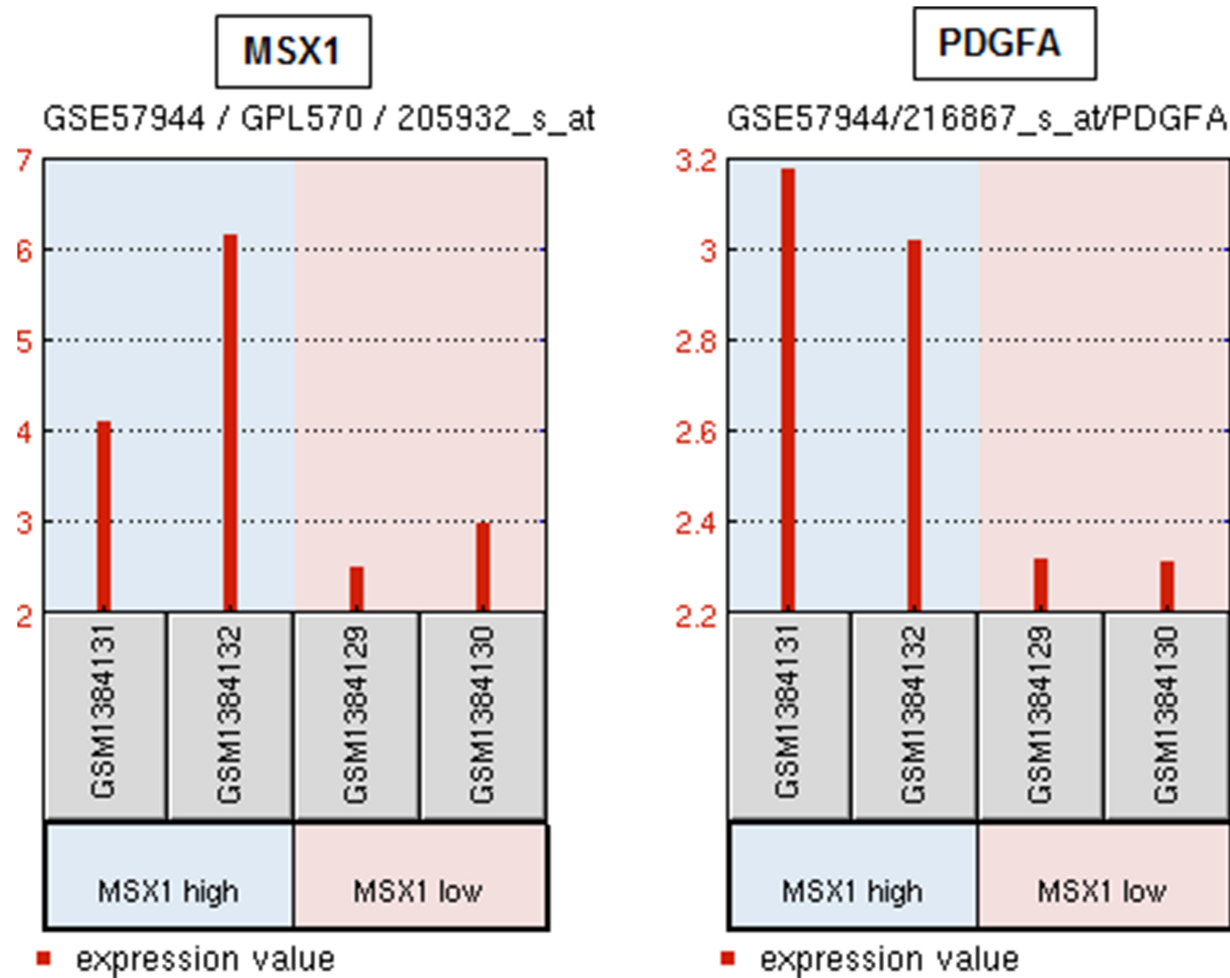

**p=0.0037**

Supplementary Figure 9: Comparative expression profiling data of HSTL patients expressing MSX1-high and MSX1-low for MSX1 (left) and PDGFA (right). The *p*-value is indicated.

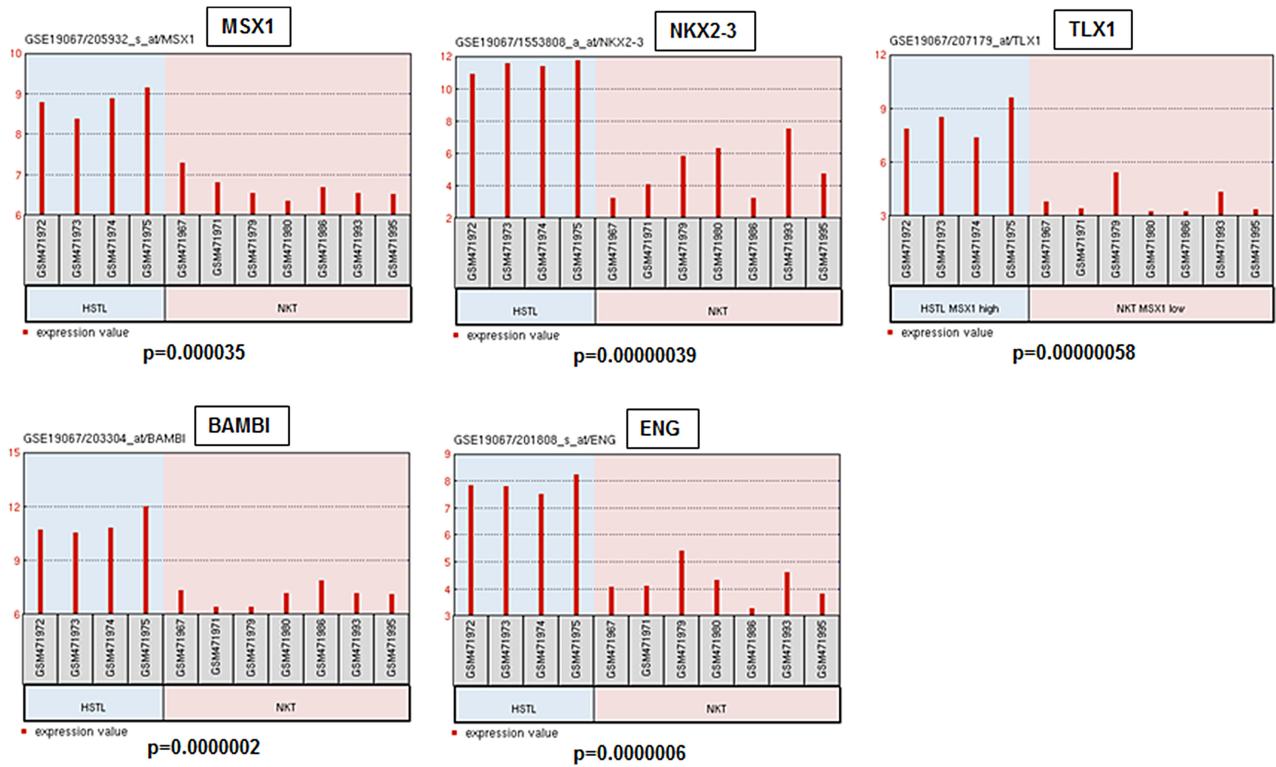

Supplementary Figure 10: Comparative expression profiling data HSTL- and NKTL-patients showing activities of MSX1, NKX2-3, TLX1, BAMBI and ENG. The *p*-values are indicated.

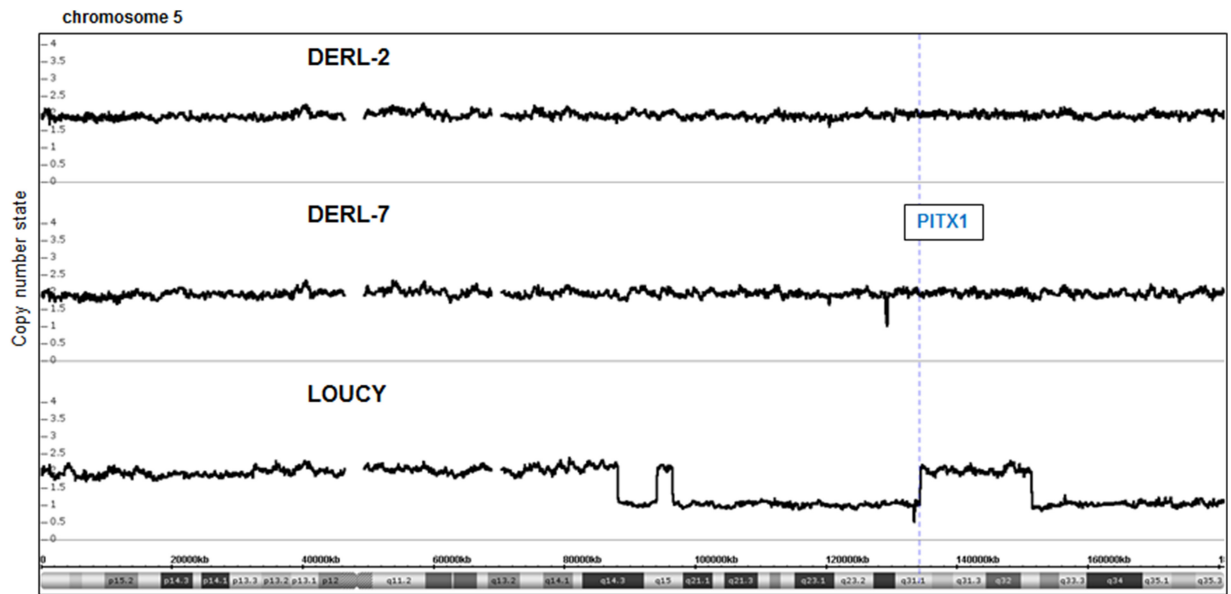

Supplementary Figure 11: Genomic profiling data of DERL-2, DERL-7 and LOUCY for chromosome 5, demonstrating a PITX1 downstream deletion just in LOUCY.

Supplementary Table 1: Comparative expression profiling data of DERL-2 and DERL-7. See Supplementary Table\_1

Supplementary Table 2: Comparative expression profiling data of DERL-7 and selected NK-cell lines showing the overexpressed genes in DERL-7. See Supplementary Table\_2
